# Supplementary material for: Assembly of two 3-D metal–organic frameworks from Cd(II) and 4,5-imidazoledicarboxylic acid or 2-ethyl-4,5-imidazoledicarboxylic acid
Source: Royal Society of Chemistry journal article supplement (doi:10.1039/b812782b), 2008-01-01
Supplement: b812782b.pdf [file b812782b.pdf]

## Supporting Information

### **Assembly of two 3-D metal-organic frameworks from Cd(II) and 4,5-imidazoledicarboxylic acid or 2-ethyl-4,5-imidazoledicarboxylic acid**

Shuang Wang, Lirong Zhang, Guanghua Li, Qisheng Huo and Yunling Liu\*

*State Key Laboratory of Inorganic Synthesis and Preparative Chemistry, College of Chemistry, Jilin University, Changchun 130012, P. R. China. E-mail: yunling@jlu.edu.cn*

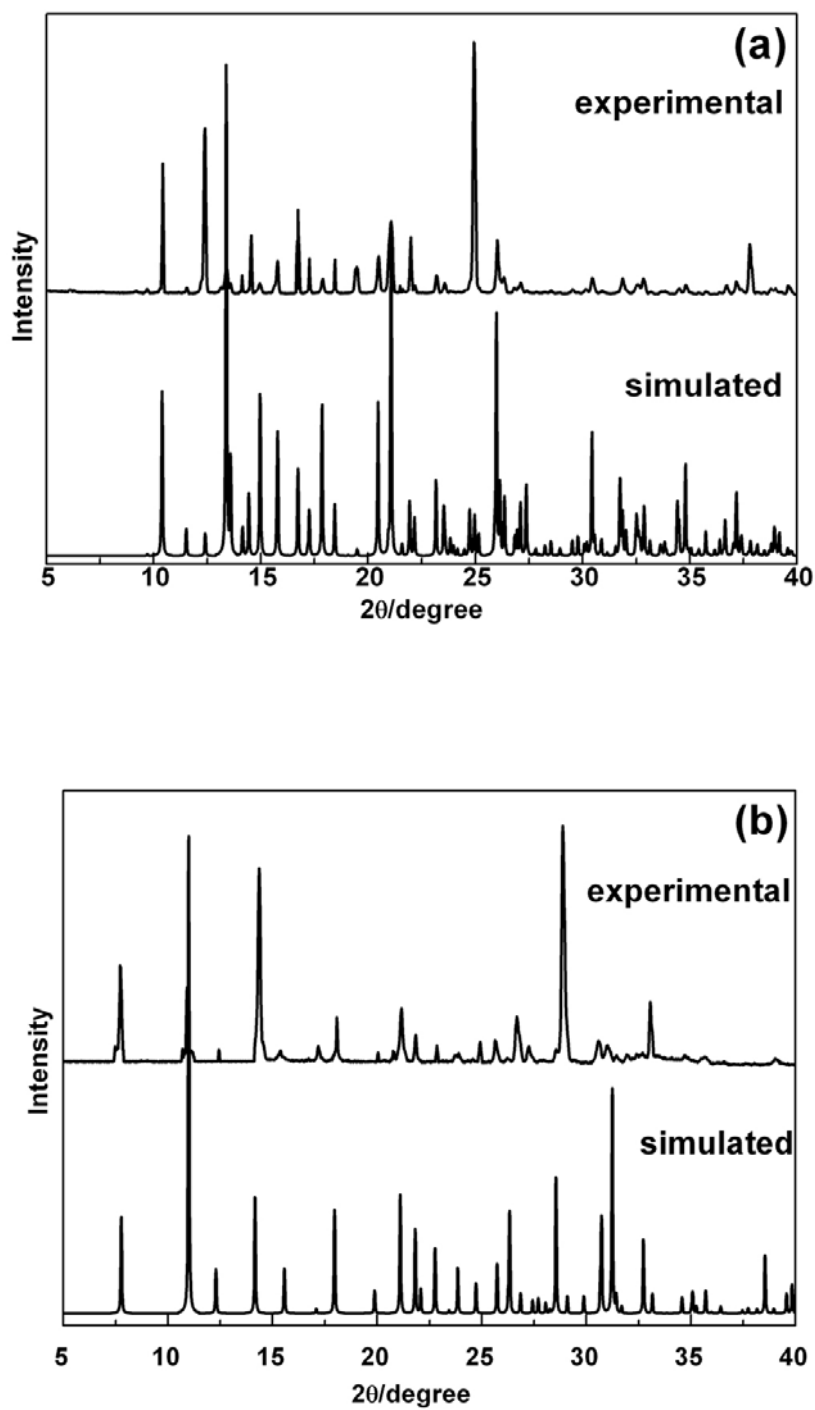

**Fig. S1** Simulated and experimental powder X-ray diffraction patterns of **1(a)** and **2(b)**.

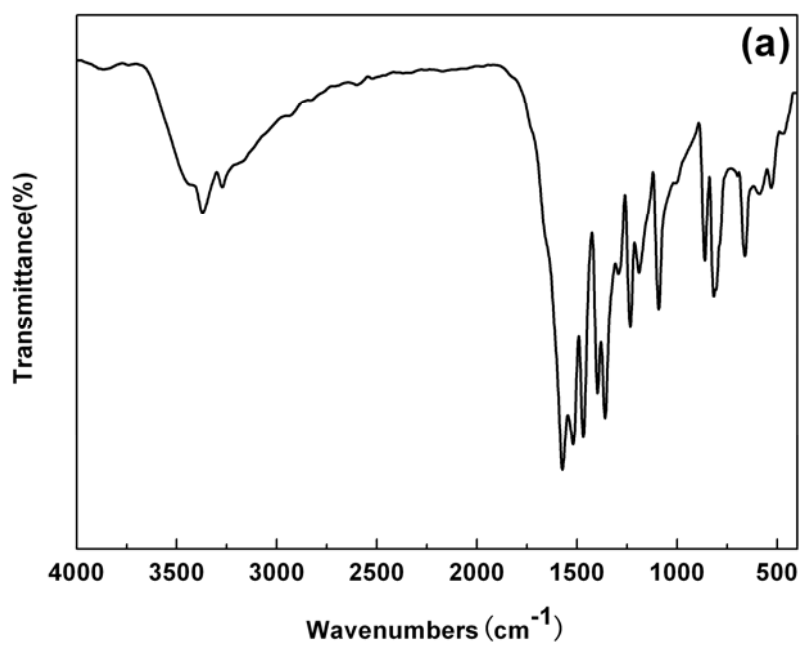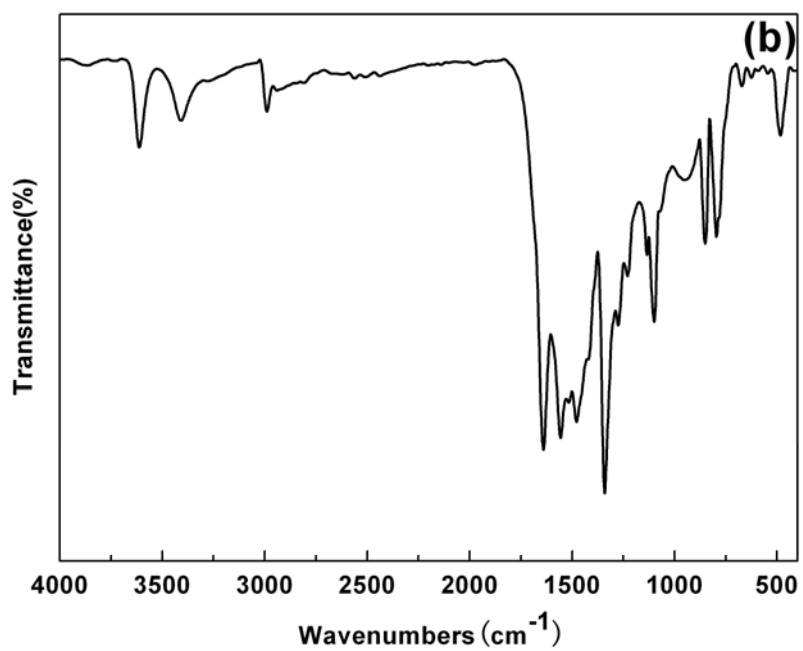

**Fig. S2** IR spectra for compound **1(a)** and **2(b)**.

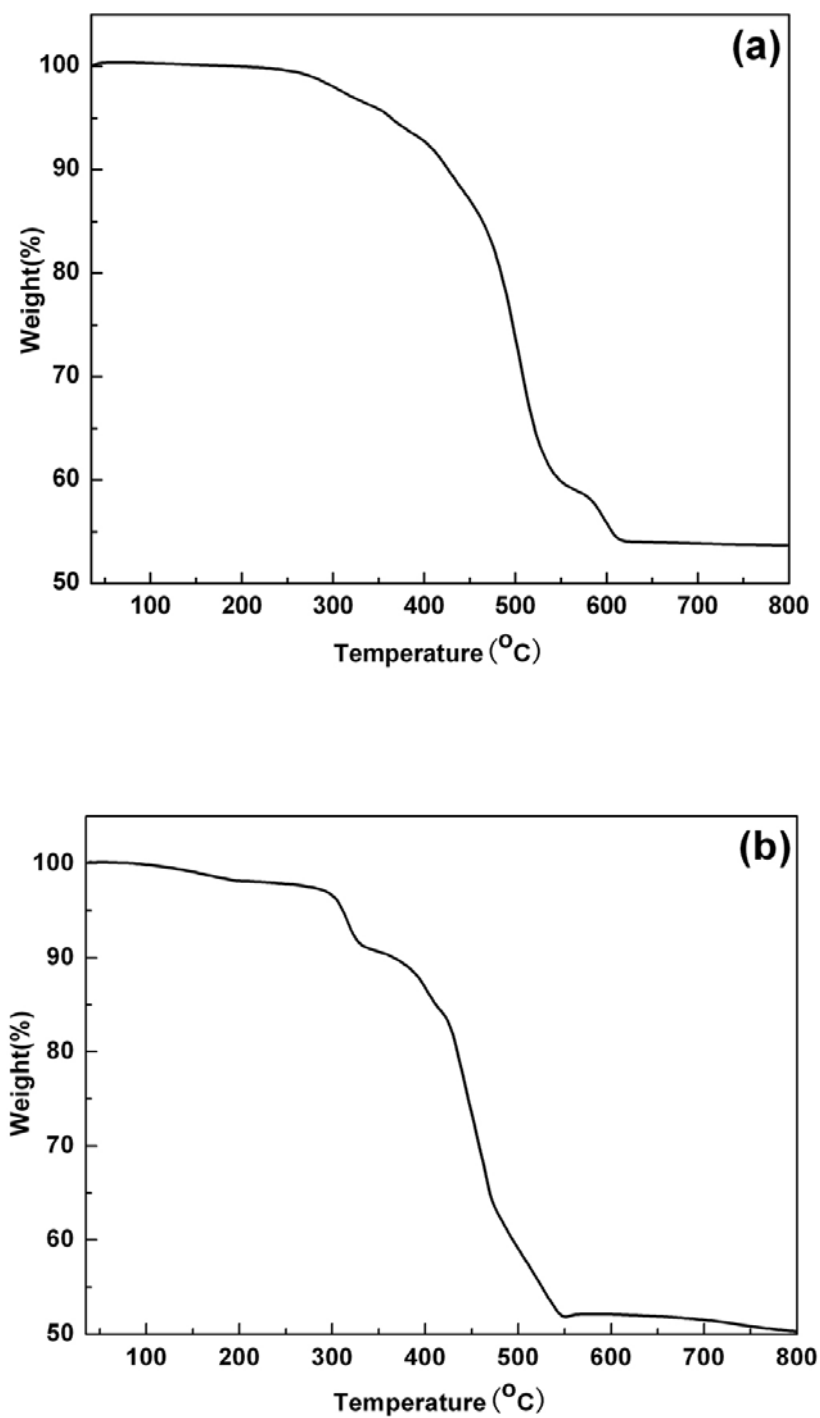

**Fig. S3** TG curves for compound **1(a)** and **2(b)**.

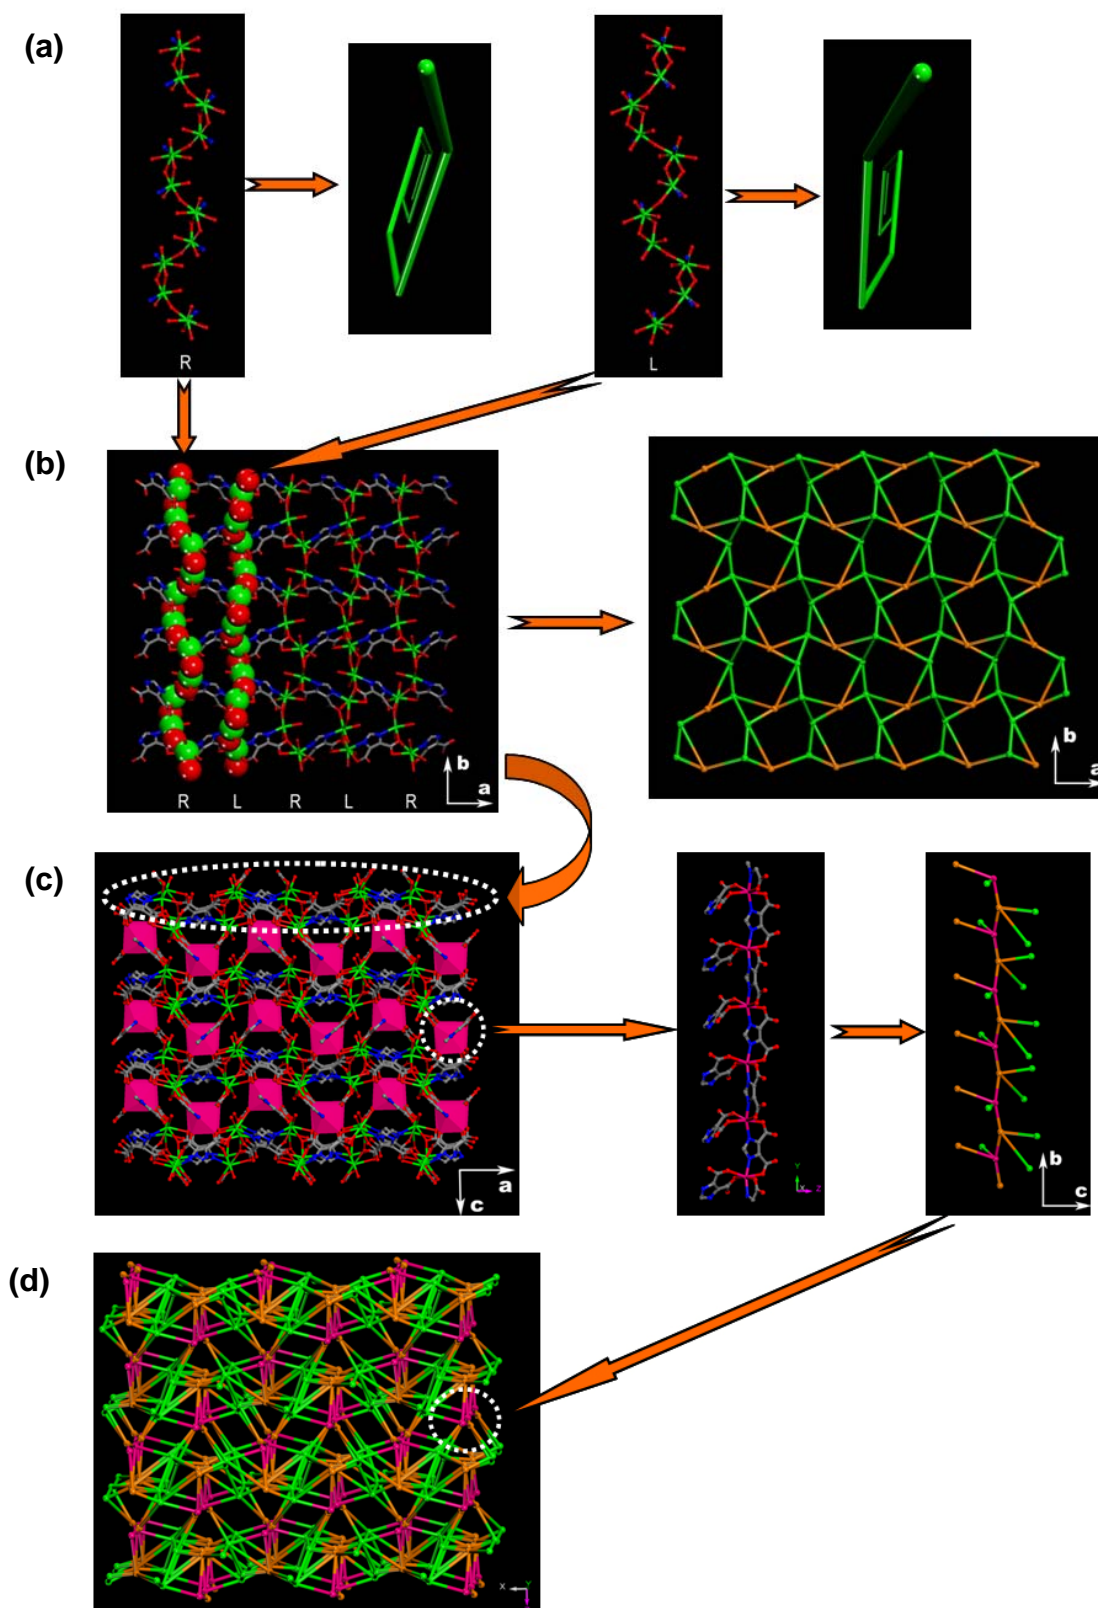

**Fig. S4** The 3-D framework structure of **1**: (a) Ball and stick view of right-handed (R) and left-handed (L) helical chains; (b) The 2-D layer viewed along the *c*-axis and the topology of 2-D layer with distorted *Kagomé* net; (c) The 3-D framework of **1** formed by 2-D layers and 1-D chains viewed along the *b*-axis; (d) The framework topology of **1** viewed along the *b*-axis. (Color code: Cd1 and Cd2 atom: green; Cd3 atom: pink; O: red; C: grey; N: blue, the IMDC ligands are denoted by yellow spheres in the topology).

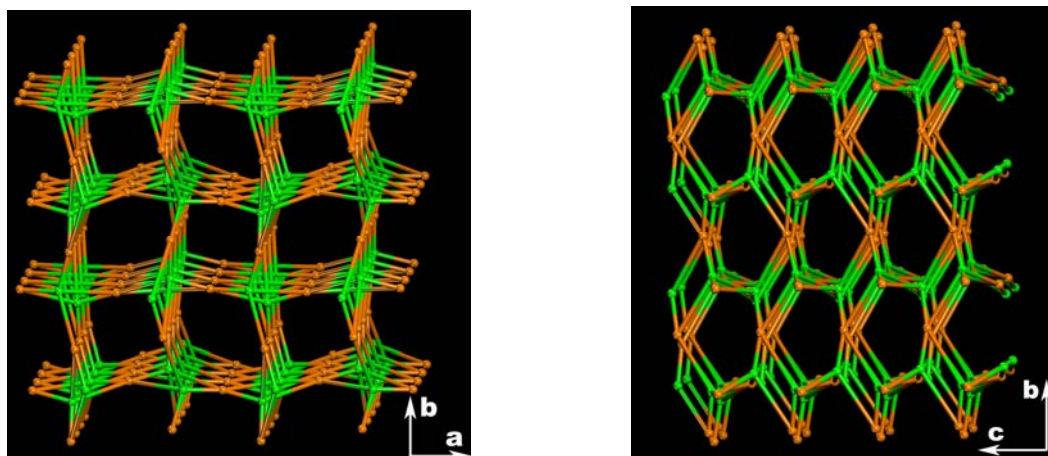

**Fig. S5** The topology of the 3D framework of **2** viewed along the *c*-axis and *a*-axis. (Color code: Cd: green; the 2-EtIMDC ligands as 4-connected nodes are denoted by yellow spheres).

**Table S1.** Hydrogen bonds for **1** [Å and deg.].

| D-H...A                 | d(D-H)   | d(H...A) | d(D...A)  | <(DHA)  |
|-------------------------|----------|----------|-----------|---------|
| O(9)-H(9A)...N(4)#7     | 0.96(8)  | 2.43(4)  | 3.333(7)  | 157(8)  |
| O(9)-H(9B)...O(6)#2     | 0.96(6)  | 2.18(3)  | 3.123(7)  | 169(9)  |
| O(10)-H(10A)...O(1W)#8  | 0.99(10) | 2.10(10) | 2.949(11) | 143(8)  |
| O(10)-H(10A)...O(4)#8   | 0.99(10) | 2.53(10) | 3.250(9)  | 130(7)  |
| O(10)-H(10B)...O(1W)#9  | 1.00(10) | 1.98(10) | 2.896(10) | 152(8)  |
| O(10)-H(10B)...O(10)#10 | 1.00(10) | 2.38(10) | 3.000(11) | 119(7)  |
| O(1W)-H(1A)...O(8)#7    | 0.86(10) | 2.31(11) | 3.031(9)  | 141(9)  |
| O(1W)-H(1B)...O(4)      | 0.86(11) | 2.07(11) | 2.885(8)  | 157(10) |

Symmetry transformations used to generate equivalent atoms:

#1  $-x+1/2, y-1/2, z$  #2  $-x, y-1/2, -z+1/2$  #3  $-x+1/2, -y+1, z-1/2$  #4  $-x+1/2, y+1/2, z$  #5  $-x, y+1/2, -z+1/2$  #6  $-x+1/2, -y+1, z+1/2$  #7  $x-1/2, y, -z+1/2$  #8  $-x, -y+1, -z$  #9  $x, y-1, z$  #10  $-x, -y, -z$
